# Supplementary material for: Three, six, or twelve months of dual antiplatelet therapy after DES implantation in patients with or without acute coronary syndromes: an individual patient data pairwise and network meta-analysis of six randomized trials and 11 473 patients
Source: Oxford University Press journal article supplement (doi:10.1093/eurheartj/ehw627), 2016-12-08
Supplement: ehw627_supp.doc [file ehw627_supp.doc]

**Supplemental Table 1. Main characteristics of the randomized trials included in the meta-analysis**

| **Study** | **N patients** | **Primary endpoint** | **Design** | **Follow-up** | **DAPT duration (months)** | **Results of the primary endpoint** |
| --- | --- | --- | --- | --- | --- | --- |
| EXCELLENT | 6 months (n=722)  12 months (n=721) | Cardiac death/MI/ ischemia-driven TVR | Non-inferiority | 1 year | 6 versus 12 | Non-inferiority demonstrated |
| ITALIC | 6 months (n=953)  24 months (n=941) | Death/MI/ TVR/Stroke/Major bleeding | Non-inferiority | 36 months | 6 versus 24 | Non-inferiority demonstrated |
| OPTIMIZE | 3 months (n=1,563)  12 months (n=1,556) | Death/MI/CVA/major bleeding | Non-inferiority | 1 year | 3 versus 12 | Non-inferiority demonstrated |
| PRODIGY | 6 months (n=751)  12 months (n=750) | Death/MI/CVA | Superiority | 2 years | 6 versus 24 | Superiority of 24-month DAPT not demonstrated |
| RESET | 3 months (n=1,059)  12 months (n=1,058) | Cardiac death/MI/ST/TVR/ major bleeding | Non-inferiority | 1 year | 3 versus 12 | Non-inferiority demonstrated |
| SECURITY | 6 months (n=682)  12 months (n=717) | Cardiac death/MI/Stroke/ST/Major Bleeding | Non-inferiority | 1 year | 6 versus 12 | Non-inferiority demonstrated |

EXCELLENT denotes Efficacy of Xience/Promus Versus Cypher to Reduce Late Loss After Stenting; ITALIC denotes Is There A LIfe for DES after Discontinuation of Clopidogrel; OPTIMIZE denotes Optimized Duration of Clopidogrel Therapy Following Treatment With the Zotarolimus-Eluting Stent in Real-World Clinical Practice; PRODIGY denotes The Prolonging Dual Antiplatelet Treatment After Grading Stent-Induced Intimal Hyperplasia Study; RESET denotes REal Safety and Efficacy of a 3-month dual antiplatelet Therapy following E-ZES implantation; SECURITY denotes Second Generation Drug-Eluting Stents Implantation Followed by Six Versus Twelve-Month - Dual Antiplatelet Therapy; MI denotes myocardial infarction, TVR denotes target vessel revascularization, CVA denotes cerebrovascular accident, ST denotes stent thrombosis, DAPT denotes dual antiplatelet therapy.

**Supplemental Table 2. Inclusion, exclusion criteria and internal validity assessment of randomized trials included in the meta-analysis**

| **Study** | **Randomization** | **Major inclusion criteria** | **Major exclusion criteria** | **Concealment of**  **allocation treatment** | **Intention-to-treat**  **analysis** | **Blinded adjudication**  **of events** |
| --- | --- | --- | --- | --- | --- | --- |
| EXCELLENT | Index procedure | Clinical or instrumental evidence of myocardial ischemia with at least 1 lesion in native coronary vessel with vessel diameter 2.25 mm to 4.25 mm. | MI within 72 hours, LVEF<25%, cardiogenic shock, serum Creatinine>265.2 µmol/L, CTO, left main disease, true bifurcation requiring 2 stents. | Yes | Yes | Yes |
| ITALICS | Index procedure | Stable/unstable angina, treated with at least 1 everolimus-eluting stent. | In-stent restenosis, left main disease, SVG, STEMI within 48 h, NSTEMI within 6 months; LVEF < 30%; CKD; BMS implanted in the 3 months before the target procedure. | Yes | Yes | Yes |
| OPTIMIZE | Index procedure | Stable angina or low risk unstable angina with at least 1 lesion in native coronary vessel ≥2.5 mm in diameter. | STEMI, scheduled elective surgery within 12 months, in stent restenosis of DES, BMS in non target vessel in the last 6 months. | Yes | Yes | Yes |
| PRODIGY | 30 days after PCI | Stable angina or acute coronary syndrome including STEMI with at least 1 lesion in native coronary vessel ≥2.25 mm in diameter. | Planned surgery within 24 months, history of bleeding, concomitant need of oral anticoagulant therapy. | Yes | Yes | Yes |
| RESET | Index procedure | Stable angina or acute MI with more than 50% diameter stenosis in a coronary artery. | Cardiogenic shock, STEMI within 48 hours, LVEF<40%, previous stent thrombosis, CTO, restenotic lesion. | Yes | Yes | Yes |
| SECURITY | Index procedure | All comers. | STEMI, left main disease. | Yes | Yes | Yes |

EXCELLENT denotes Efficacy of Xience/Promus Versus Cypher to Reduce Late Loss After Stenting; OPTIMIZE denotes Optimized Duration of Clopidogrel Therapy Following Treatment With the Zotarolimus-Eluting Stent in Real-World Clinical Practice; PRODIGY denotes The Prolonging Dual Antiplatelet Treatment After Grading Stent-Induced Intimal Hyperplasia Study; RESET denotes REal Safety and Efficacy of a 3-month dual antiplatelet Therapy following E-ZES implantation; ITALIC denotes Is There A LIfe for DES after Discontinuation of Clopidogrel; SECURITY denotes Second Generation Drug-Eluting Stent Implantation Followed by Six- Versus Twelve-Month Dual Antiplatelet Therapy; PCI denotes percutaneous coronary intervention; BMS denotes bare metal stent; MI denotes myocardial infarction, STEMI denotes ST-segment elevation MI, LVEF denotes left ventricular ejection fraction, CKD denotes chromic kidney disease; SVG denotes saphenous vein graft; CTO denotes chronic total occlusion.

**Supplemental Table 3. Definition of clinical endpoints in each randomized trial included in the meta-analysis**

|  | | **OPTIMIZE** | | **RESET** | | **EXCELLENT** | | **PRODIGY** | | **ITALIC** | | **SECURITY** | |
| --- | --- | --- | --- | --- | --- | --- | --- | --- | --- | --- | --- | --- | --- |
| Cardiac death | | Any death unless a definite non-cardiovascular cause could be established. | | Any death unless a definite non-cardiovascular cause could be established. | | Any death unless a definite non-cardiovascular cause could be established. | | Any death unless a definite non-cardiovascular cause could be established. | | Any death unless a definite non-cardiovascular cause could be established. | | Any death without a noncardiac cause. | |
| Myocardial infarction | | -Periprocedural: rise in CPK-MB or troponin> 3 times ULN within 48 hours after PCI or >5 times ULN, with new Q wave/LBBB after CABG.  -Spontaneous: any CK-MB or troponin rise greater than the ULN. | | Typical symptoms, with EKG changes and a rise in CPK-MB> 3 times the ULN range or troponinT/troponin-I more than the 99th percentile of the ULN, unrelated to an interventional procedure | | -Periop rise in CK-MB or troponin> 3 times ULN within 48 hours after PCI  -Spontaneous: typical symptoms combined with a CPK-MB fraction or troponin T/troponin> than the ULN. | | Rise and/or fall of cardiac biomarker values with at least one value above the 99th percentile ULN and with at least one of the following:  -Symptoms of ischemia.  -Typical EKG changes  -New pathological Q waves  -Evidence of new loss of viable myocardium | | - Development of new pathological Q waves in 2 or more contiguous leads with elevated creatine kinase (CK), CK-MB, or troponin levels.  -Greater than 2-fold CK elevation with elevated CK-MB or troponin without new pathological Q wave. | | -Troponin T/I or CK MB above the upper normal limit associated with at least 1 ischemic symptom  -New Q waves  -Typical EKG changes | |
| Stroke | | Acute neurological event with duration≥24 hours with confirmation by either computed tomography or magnetic resonance imaging or pathological confirmation. | | Sudden onset of vertigo, numbness, aphasia, or dysarthria resulting from vascular lesions of the brain, including hemorrhage, embolism, thrombosis, or rupturing aneurysm. | | New neurological deficit confirmed by a neurologist and on imaging. | | New neurological deficit confirmed by a neurologist and on imaging. | | New neurological deficit ending in death or lasting longer than 24 h confirmed by a neurologist and by CT scan. | | Any new neurological deficit lasting >24 h confirmed by CT scan. | |
| Unstable Angina | WHO criteria | | AHA/ACC criteria | | NA | | NA | | NA | | Braunwald classification | |  |
| Target vessel revascularization | | A new percutaneous or surgical coronary re-intervention of a target vessel. | | Repeat PCI or CABG of the target vessel due to ischemic symptoms or positive stress test and angiographic minimal lumen diameter stenosis ≥50%, or angiographic diameter stenosis ≥70% without ischemic symptoms or positive stress test. | | Defined as repeat PCI or CABG of the target vessel. | | Defined as repeat PCI or CABG of the target vessel. | | Repeat coronary revascularization (PCI or surgery) of the target vessel. | | Defined as repeat PCI or CABG of the target vessel. | |
| Stent thrombosis | | ARC criteria | | ARC criteria | | ARC criteria | | ARC criteria | | ARC criteria | | ARC criteria | |
| Bleeding | | REPLACE criteria | | TIMI criteria | | TIMI criteria | | TIMI and BARC criteria | | TIMI criteria | | BARC criteria | |

OPTIMIZE denotes Optimized Duration of Clopidogrel Therapy Following Treatment With the Zotarolimus-Eluting Stent in Real-World Clinical Practice; ITALIC denotes Is There A LIfe for DES after Discontinuation of Clopidogrel; RESET denotes REal Safety and Efficacy of a 3-month dual antiplatelet Therapy following E-ZES implantation; PRODIGY denotes The Prolonging Dual Antiplatelet Treatment After Grading Stent-Induced Intimal Hyperplasia Study; EXCELLENT denotes Efficacy of Xience/Promus Versus Cypher to Reduce Late Loss After Stenting; SECURITY denotes Second Generation Drug-Eluting Stents Implantation Followed by Six Versus Twelve-Month - Dual Antiplatelet Therapy; CPK-MB denotes creatine phospokinase myocardial band; ULN denotes upper limit of normal; LBB denotes left bundle branch block; PCI denotes percutaneous coronary intervention, CABG denotes coronary artery bypass grafting; EKG denotes electrocardiography; NA denotes not available; ARC denotes Academic Research Consortium; REPLACE denotes Randomized Evaluation of PCI Linking Angiomax to Reduced Clinical Events; TIMI denotes thrombolysis in Myocardial Infarction; BARC denotes Bleeding Academic Research Consortium; AHA/ACC denotes American Heart Association/American College of Cardiology; WHO denotes World Health Organization; NA denotes not available.

**Supplemental Table 4. Baseline clinical, angiographic and procedural characteristics of the whole cohort of patients stratified according to dual antiplatelet therapy duration.**

|  | **Short DAPT**  **(≤6 months)** | **Long DAPT**  **(≥1 year)** | **P value** |
| --- | --- | --- | --- |
| Age | 63.1±10.7 | 63.2±10.8 | 0.59 |
| Male | 70.3% (4,029/5,730) | 69.5% (3,990/5,743) | 0.30 |
| Hypertension | 78.0% (4,466/5,723) | 78.6% (4,507/5,732) | 0.37 |
| Diabetes mellitus | 31.4% (1,784/5,688) | 31.7% (1,809/5,701) | 0.63 |
| Hypercholesterolemia | 63.9% (3,599/5,632) | 64.5% (3,634/5,637) | 0.52 |
| Smoking | 22.6% (1,117/4,946) | 21.7% (1,073/4,939) | 0.29 |
| Prior myocardial infarction | 21.9% (1,129/5,166) | 21.7% (1,121/5,157) | 0.10 |
| Prior PCI | 18.3% (948/5,187) | 17.0% (879/5,172) | 0.16 |
| Prior CABG | 6.0% (312/5,188) | 6.0% (325/5,167) | 0.46 |
| Prior stroke | 4.2% (156/3,751) | 3.7% (136/3,701) | 0.31 |
| CKD* | 0.6% (20/43,214) | 0.8% (27/3,246) | 0.30 |
| LVEF <40% | 8.1% (396/4,862) | 7.7% (375/4,870) | 0.45 |
| Clinical presentation |  |  | 0.76 |
| Stable CAD | 56.8% (3,132/5,515) | 57.1% (3,167/5,543) |  |
| Unstable CAD | 29.0% (1,604/5,515) | 28.6% (1,583/5,543) |
| NSTEMI | 8.3% (459/5,515) | 8.8% (485/5,543) |
| STEMI within 24 hrs | 4.5% (246/5,515) | 4.4% (242/5,543) |
| STEMI >24 hrs-7 days | 1.3 % (74/5,515) | 1.2% (66/5,543) |  |
| Discharge medications |  |  |  |
| Aspirin | 99.9% (3,976/3,982) | 99.7% (3,993/4,007) | 0.09 |
| Clopidogrel | 99.6% (3,966/3,982) | 99.7% (3,997/4,008) | 0.31 |
| Beta-blockers | 69.2% (2,286/3,304) | 70.4% (2,320/3,292) | 0.25 |
| ACEI/ARB | 58.9% (1,946/3,304) | 58.0% (1,910/3,392) | 0.47 |
| Statins | 88.0% (2,906/3,304) | 86.7% (2,854/3,292) | 0.12 |
| Diseased vessels/patient | 1.50±0.83 | 1.50±0.82 | 0.66 |
| Number of stented vessels/patient | 1.21±0.45 | 1.21±0.45 | 0.78 |
| Number of stents/patient | 1.52±0.84 | 1.53±0.83 | 0.56 |
| Number of lesions stented/patient | 1.28±0.54 | 1.29±0.54 | 0.79 |
| Total stent length/patient (mm) | 35.29±24.32 | 35.83±23.96 | 0.41 |
| DES type |  |  | <0.01 |
| PES | 5.8% (259/4,500) | 5.7% (257/4,537) |  |
| SES | 3.6% (164/4,500) | 11.1% (505/4,537) |
| CoCr-EES | 20.0% (901/4,500) | 25.9% (1,177/4,537) |
| ZES fast release | 70.1% (3,155/4,500) | 56.7% (2,570/4,537) |
| Mixed | 0.5% (21/4,500) | 0.6% (28/4,537) |
| Stented coronary artery |  |  |  |
| Left main | 2.3% (80/3,374) | 2.3% (77/3,367) | 0.15 |
| LAD | 63.3% (2,419/3,824) | 62.7% (2,383/3,800) | 0.51 |
| Left circumflex | 31.4% (1,116/3,557) | 32.3% (1,159/3,584) | 0.26 |
| Right | 36.2% (1,302/3,599) | 36.0% (1,290/3,575) | 0.83 |
| Bifurcation | 9.5% (318/3,344) | 10.2% (340/3,335) | 0.28 |
| CTO | 2.9% (98/3,344) | 2.2% (73/3,335) | 0.30 |

DAPT denotes dual antiplatelet therapy; CAD denotes coronary artery disease; PCI denotes percutaneous coronary intervention; CABG denotes coronary artery bypass grafting; NSTEMI denotes non ST-segment elevation acute myocardial infarction; STEMI denotes ST-segment elevation acute myocardial infarction; CKD denotes chronic kidney disease; LVEF denotes left ventricular ejection fractiion; ARB denotes angiotensin receptor blockade; DES denotes drug-eluting stents; PES denotes paclitaxel eluting-stents; SES denotes sirolimus-eluting stents; CoCr-EES denotes cobalt-chromium everolimus-eluting stents; ZES denotes zotarolimus-eluting stents; LAD denotes left anterior descending artery; CTO denotes chronic total occlusion; hrs denotes hours; d denotes days. *Defined as serum creatinine levels >2 mg/dl.

**Supplemental Table 5. Baseline clinical, angiographic and procedural characteristics of patients with or without acute coronary syndrome stratified according to dual antiplatelet therapy duration.**

**Acute Coronary Syndromes Stable Coronary Artery disease**

|  | Short DAPT  (n=2,383) | Long DAPT  (n=2,375) | P | Short DAPT  (3,347) | Long DAPT  (3,367) | P |
| --- | --- | --- | --- | --- | --- | --- |
| Age | 63.3±11.06 | 63.2±11.13 | 0.61 | 62.9±10.2 | 63.2±10.5 | 0.21 |
| Male | 70.6% (1,683/2,383) | 69.5% (1,651/2,375) | 0.44 | 70.1% (2,347/3,347) | 69.4% (2,338/3,367) | 0.50 |
| Hypertension | 71.8% (1,712/2,383) | 72.8% (1,729/2,375) | 0.43 | 82.5% (2,754/3,340) | 82.7% (2,777/3,358) | 0.81 |
| Diabetes mellitus | 30.5% (721/2,367) | 28.9% (683/2,363) | 0.24 | 32.0% (1,063/3,321) | 33.7% (1,126/3,337) | 0.13 |
| Hypercholesterolemia | 60.9% (1,426/2,340) | 60.0% (1,402/2,335) | 0.52 | 66.0% (2,173/3,292) | 67.6% (2,231/3,301) | 0.18 |
| Smoking | 26.6% (585/2,195) | 26.4% (581/2,199) | 0.83 | 19.3% (532/2,751) | 18.0% (492/2,739) | 0.22 |
| Prior MI | 20.6% (451/2,186) | 20.0% (437/2,185) | 0.60 | 22.7% (678/2,980) | 23.0% (684/2,971) | 0.80 |
| Prior PCI | 14.7% (322/2,191) | 12.9% (282/2,187) | 0.09 | 20.9% (626/2,996) | 20.0% (597/2,984) | 0.41 |
| Prior CABG | 5.7% (126/2,193) | 5.2% (113/2,186) | 0.41 | 6.2% (186/2,995) | 7.1% (211/2,980) | 0.18 |
| Prior stroke | 4.6% (65/1,422) | 3.9% (55/1,405) | 0.38 | 3.9% (91/2,329) | 3.5% (81/2,296) | 0.51 |
| CKD | 0.9% (16/1,725) | 1.4% (24/1,725) | 0.21 | 0.3% (4/1,489) | 0.2% (3/1,520) | 0.69 |
| LVEF <40% | 8.9% (186/2,077) | 8.1% (167/2,052) | 0.35 | 7.5% (210/2,785) | 7.4% (208/2,818) | 0.83 |
| ACS presentation |  |  | 0.93 |  |  |  |
| Unstable CAD | 67.3% (1,604/2,383) | 66.6% (1,582/2,375) |  |  |  |  |
| NSTEMI | 19.3% (459/2,383) | 20.4% (485/2,375) |  |  |  |  |
| STEMI< 24hrs | 10.3% (246/2,383) | 10.2% (242/2,375) |  |  |  |  |
| STEMI>24 hrs-7d | 3.1% (74/2,383) | 2.8% (66/2,375) |  |  |  |  |
| Discharge medications |  |  |  |  |  |  |
| Aspirin | 99.8% (1,517/1,520) | 99.6% (1,515/1,521) | 0.33 | 99.9% (2,459/2,462) | 99.7% (2,478/2,486) | 0.15 |
| Clopidogrel | 99.7% (1,515/1,520) | 99.5% (1,514/1,522) | 0.41 | 99.6% (2,451/2,462) | 99.9% (2,483/2,486) | 0.34 |
| Beta blockers | 71.0% (929/1,308) | 69.7% (902/1,294) | 0.46 | 68.0% (1,357/1,996) | 71.0% (1,418/1,998) | 0.04 |
| ACEI/ARB | 65.8% (861/1,308) | 62.2% (805/1,294) | 0.06 | 54.4% (1,085/1,996) | 55.3% (1,105/1,998) | 0.54 |
| Statins | 85.4% (1,117/1,308) | 85.9% (1,111/1,294) | 0.73 | 89.6% (1,789/1,996) | 87.2% (1,743/1,998) | 0.02 |
| Diseased vessels† | 1.62±0.85 | 1.59±0.82 | 0.16 | 1.41±0.80 | 1.43±0.81 | 0.46 |
| Stented vessels† | 1.25±0.49 | 1.26±0.49 | 0.56 | 1.19±0.43 | 1.18±0.42 | 0.32 |
| Stents† | 1.54±0.86 | 1.56±0.87 | 0.45 | 1.50±0.83 | 1.50±0.79 | 0.97 |
| Lesions stented† | 1.28±0.55 | 1.30±0.56 | 0.42 | 1.28±0.54 | 1.28±0.53 | 0.76 |
| Stent length (mm) | 34.75±23.24 | 36.26±24.51 | 0.09 | 36.08±25.83 | 35.22±23.12 | 0.46 |
| DES type |  |  | <0.01 |  |  | <0.01 |
| PES | 9.3% (186/2,005) | 8.9% (179/2,015) |  | 2.9% (73/2,495) | 3.1% (78/2,521) |  |
| SES | 4.3% (87/2,005) | 9.6% (193/2,015) |  | 3.1% (77/2,495) | 12.4% (312/2,521) |  |
| CoCr-EES | 24.1% (483/2,005) | 31.1% (627/2,015) |  | 16.8% (418/2,495) | 21.8% (549/2,521) |  |
| ZES (fast release) | 61.8% (1,239/2,005) | 49.5% (998/2,015) |  | 76.8% (1,916/2,495) | 62.4% (1,572/2,521) |  |
| Mixed | 0.5% (10/2,005) | 0.9% (18/2,015) |  | 0.4% (11/2,495) | 0.4% (10/2,521) |  |
| Stented coronary artery | |  |  |  |  |  |
| Left main | 2.4% (46/1,882) | 2.8% (53/1,867) | 0.45 | 1.5% (33/2,213) | 1.1% (24/2,217) | 0.23 |
| LAD | 58.4% (1,099/1,882) | 59.5% (1,111/1,867) | 0.49 | 59.6% (1,319/2,213) | 57.4% (1,272/2,217) | 0.12 |
| Left circumlex | 27.1% (511/1,882) | 28.7% (535/1,867) | 0.31 | 27.3% (605/2,213) | 28.1% (623/2,217) | 0.56 |
| Right | 33.0% (621/1,882) | 32.0% (597/1,867) | 0.51 | 30.8% (681/2,213) | 31.3% (693/2,217) | 0.73 |
| Bifurcation | 13.9% (140/1,008) | 14.4% (144/1,002) | 0.99 | 17.3% (178/1,028) | 19.0% (196/1,032) | 0.16 |
| CTO | 2.6% (34/1,326) | 2.4% (31/1,315) | 0.66 | 3.2% (64/2,018) | 2.6% (53/2,020) | 0.34 |
|  |  |  |  |  |  |  |

Continuous data are reported as mean ± standard deviation. †denotes number per patients. Other abbreviations as in Supplemental Table 4.

**Supplemental Table 6. Baseline clinical, angiographic and procedural characteristics of patient with acute coronary syndrome stratified according to dual antiplatelet therapy duration**

|  | **3 months** | **6 months** | **1 year** | **P** |
| --- | --- | --- | --- | --- |
| Age | 61.5±10.1 | 64.5±11.5 | 63.2±11.0 | 0.57 |
| Male | 64.5% (618/958) | 74.7% (1,064/1,425) | 69.5% (1,651/2,375) | 0.67 |
| Hypertension | 67.2% (644/958) | 74.9% (1,068/1,425) | 72.9% (1,729/2,373) | 0.53 |
| Diabetes mellitus | 28.7% (275/958) | 31.6% (446/1,409) | 28.9% (683/2,363) | 0.27 |
| High cholesterol | 60.0% (558/930) | 61.6% (868/1,410) | 60.0% (1,402/2,335) | 0.56 |
| Smoking | 33.4% (266/795) | 22.8% (319/1,400) | 26.4% (581/2,199) | 0.62 |
| Prior MI | 20.7% (198/958) | 20.6% (253/1,228) | 20.0% (437/2,185) | 0.50 |
| Prior PCI | 11.8% (113/958) | 17.0% (209/1,233) | 12.9% (282/2,187) | 0.04 |
| Prior CABG | 2.5% (24/958) | 8.3% (102/1,235) | 5.2% (113/2,186) | 0.59 |
| Prior stroke | 3.0% (29/956) | 7.7% (36/466) | 3.9% (55/1,405) | 0.61 |
| CKD | 0.5% (3/588) | 1.1% (13/1,137) | 1.3% (24/1,725) | 0.28 |
| LVEF< 40% | 5.7% (45/786) | 10.9% (141/1,291) | 8.1% (167/2,052) | 0.31 |
| Clinical presentation |  |  |  | 0.81 |
| Stable CAD | 0.0% (0/958) | 0.0% (0/1,425) | 0.0% (0/2,096) |  |
| Unstable CAD | 72.7% (696/958) | 43.6% (621/1,425) | 62.2% (1,303/2,096) |
| NSTEMI | 22.0% (211/958) | 17.4% (248/1,425) | 23.1% (485/2,096) |
| STEMI <24 hrs | 2.4% (23/958) | 17.3% (246/1,425) | 11.6% (242/2,096) |
| STEMI >24 hrs -7d | 3.0% (29/958) | 1.5% (22/1,425) | 3.1% (66/2,096) |
| Discharge medications |  |  |  |  |
| Aspirin | 100% (946/946) | 99.5% (574/574) | 99.6% (1,521/1,521) | 0.34 |
| Clopidogrel | 100% (946/946) | 99.1% (569/574) | 99.5% (1,514/1,522) | 0.52 |
| Beta-blockers | 73.5% (695/946) | 64.6% (234/362) | 69.7% (902/1,294) | 0.46 |
| ACEI/ARB | 64.8% (613/946) | 68.5% (248/362) | 62.2% (805/1,294) | 0.04 |
| Statins | 86.4% (817/946) | 82.9% (300/362) | 85.9% (1,111/1,294) | 0.80 |
| Diseased vessels | 1.4±0.7 | 1.8±0.9 | 1.6±0.8 | 0.23 |
| Stented vessels | 1.2±0.4 | 1.3±0.5 | 1.3±0.5 | 0.37 |
| Stent per patient | 1.4±0.7 | 1.7±1.0 | 1.6±0.9 | 0.25 |
| Lesion stented | 1.3±0.5 | 1.4±0.6 | 1.3±0.6 | 0.41 |
| Total stent length | 29.7±16.8 | 37.9±26.0 | 36.3±24.5 | 0.09 |
| Smallest stent lenght | 3.1±0.4 | 3.0±0.5 | 3.1±0.4 | 0.82 |
| DES type |  |  |  | <0.001 |
| PES | 0.0% (0/958) | 17.8% (186/1,047) | 8.9% (179/2,015) |  |
| SES | 0.0% (0/958) | 8.3% (87/1,047) | 9.6% (193/2,015) |  |
| CoCr-EES | 0.0% (0/958) | 46.1% (483/1,047) | 31.1% (627/2,015) |  |
| ZES (fast release) | 100% (958/958) | 24.7% (281/1,047) | 49.5% (998/2,015) |  |
| Mixed | 0.0% (0/958) | 1.0% (10/1,047) | 0.9% (18/2,015) |  |
| Stented coronary artery |  |  |  |  |
| Left main | 0.9% (9/958) | 4.0% (37/924) | 2.8% (53/1,867) | 0.49 |
| LAD | 59.2% (567/958) | 57.6% (532/924) | 59.5% (1,111/1,867) | 0.27 |
| Left circumflex | 25.9% (248/958) | 28.5% (263/924) | 28.7% (535/1,867) | 0.52 |
| Right | 32.0% (307/958) | 34.0% (314/924) | 31.2% (597/1,867) | 0.52 |
| Bifurcation | 3.8% (24/640) | 31.5% (116/368) | 14.4% (144/1,002) | 0.82 |
| CTO | 1.0% (10/958) | 6.5% (24/368) | 2.4% (31/1,315) | 0.76 |

Abbreviations as in Supplemental Table 4

**Supplemental Table 7. Baseline clinical, angiographic and procedural characteristics of patient with stable coronary artery disease stratified according to dual antiplatelet therapy duration**

|  | **3 months** | **6 months** | **1 year** | **P** |
| --- | --- | --- | --- | --- |
| Age | 61.8±10.0 | 63.8±10.4 | 63.2±10.5 | 0.11 |
| Male | 63.5% (1,056/1,664) | 76.7% (1,291/1,683) | 69.4% (2,338/3,367) | 0.35 |
| Hypertension | 82.1% (1,366/1,663) | 82.8% (1,388/1,677) | 82.7% (2,777/3,358) | 0.56 |
| Diabetes mellitus | 32.4% (539/1,664) | 31.6% (524/1,657) | 33.7% (1,126/3,337) | 0.20 |
| High cholesterol | 61.5% (1,006/1,636) | 70.5% (1,167/1,656) | 67.6% (2,231/3,301) | 0.14 |
| Smoking | 26.2% (291/1,113) | 14.7% (241/1,638) | 18.0% (492/2,739) | 0.14 |
| Prior MI | 23.9% (397/1,664) | 21.4% (281/1,316) | 23.0% (684/2,971) | 0.70 |
| Prior PCI | 15.1% (251/1,664) | 28.2% (375/1,332) | 20.0% (597/2,984) | 0.70 |
| Prior CABG | 5.4% (89/1,664) | 7.3% (97/1,331) | 7.1% (211/2,980) | 0.12 |
| Prior stroke | 2.3% (38/1,654) | 7.9% (53/675) | 3.5% (81/2,296) | 0.79 |
| CKD* | 0.4% (2/471) | 0.2% (2/1,018) | 0.2% (3/1,520) | 0.71 |
| LVEF< 40% | 10.0% (136/1,3653) | 5.2% (74/1,422) | 7.38% (208/2,818) | 0.95 |
| Discharge medications |  |  |  |  |
| Aspirin | 100% (1,645/1,645) | 99.6% (814/817) | 99.7% (2,478/2,486) | 0.24 |
| Clopidogrel | 99.9% (1,644/1,645) | 98.8% (807/817) | 99.9% (2,483/2,486) | 0.14 |
| Beta-blockers | 70.4% (1,158/1,645) | 56.7% (199/351) | 71.0% (1,418/1,998) | 0.04 |
| ACEI/ARB | 52.8% (869/1,645) | 61.5% (216/351) | 55.3% (1,105/1,998) | 0.57 |
| Statins | 90.4% (1,488/1,645) | 85.8% (301/351) | 87.2% (1,743/1,998) | 0.03 |
| Diseased vessels | 1.3±0.5 | 1.6±0.9 | 1.5±0.7 | 0.46 |
| Stented vessels | 1.2±0.4 | 1.2±1.0 | 1.4±0.8 | 0.55 |
| Stent per patient | 1.5±0.7 | 1.6±1.2 | 1.5±0.8 | 0.60 |
| Lesion stented | 1.3±0.5 | 1.4±0.6 | 1.3±0.5 | 0.86 |
| Total stent length | 30.6±18.3 | 40.8±30.1 | 35.2±23.1 | 0.93 |
| Smallest stent | 3.1±0.4 | 3.0±0.5 | 3.1±0.9 | 0.97 |
| DES type |  |  |  | <0.01 |
| PES | 0.0% (0/1,664) | 8.8% (73/831) | 3.1% (78/2,521) |  |
| SES | 0.0% (0/1,664) | 9.3% (77/831) | 12.4% (312/2,521) |  |
| CoCr-EES | 0.0% (0/1,664) | 53.3% (418/831) | 21.8% (549/2,521) |  |
| ZES (fast release) | 100% (1,664/1,664) | 30.3% (252/831) | 62.4% (1,572/2,521) |  |
| Mixed | 0.0% (0/1,665) | 1.3% (11/831) | 0.4% (10/2,521) |  |
| Stented coronary artery |  |  |  |  |
| Left main | 0.9% (15/1,664) | 3.3% (18/549) | 1.1% (24/2,217) | 0.47 |
| LAD | 60.1% (1,000/1,664) | 58.1% (319/549) | 57.4% (1,272/2,217) | 0.14 |
| Left circumflex | 26.6% (443/1,664) | 29.5% (162/549) | 28.1% (623/2,217) | 0.65 |
| Right | 30.0% (499/1,664) | 33.1% (182/549) | 31.3% (693/2,217) | 0.60 |
| Bifurcation | 10.1% (68/674) | 31.1% (110/354) | 19.0% (196/1,032) | 0.21 |
| CTO | 2.2% (37/1,664) | 7.6% (27/354) | 2.02% (53/2,020) | 0.55 |

Abbreviations as in Supplemental Table 4.

**Supplemental Table 8. Baseline clinical, angiographic and procedural characteristics of the whole cohort of patients included in the landmark analysis and stratified according to dual antiplatelet therapy duration.**

|  | **Short DAPT**  **(≤6 months)** | **Long DAPT**  **(>1 year)** | **P value** |
| --- | --- | --- | --- |
| Age | 63.0±10.5 | 63.1±10.8 | 0.59 |
| Male | 44.3% (2,434/5,500) | 43.3% (2,384/5,506) | 0.40 |
| Hypertension | 78.0% (4,283/5,492) | 78.7% (4,323/5,495) | 0.29 |
| Diabetes mellitus | 31.2% (1,703/5,458) | 31.4% (1,718/5,465) | 0.73 |
| Hypercholesterolemia | 64.0% (3,456/5,404) | 64.6% (3,492/5,405) | 0.47 |
| Smoking | 22.6% (1,073/4,757) | 21.8% (1,035/4,743) | 0.35 |
| Prior myocardial infarction | 21.6% (1,066/4,942) | 21.4% (1,055/4,933) | 0.96 |
| Prior PCI | 18.3% (912/4,962) | 16.7% (828/4,948) | 0.07 |
| Prior CABG | 5.9% (291/4,963) | 6.1% (302/4,943) | 0.49 |
| Prior stroke | 64.0% (142/3,605) | 3.7% (130/3,554) | 0.58 |
| CKD | 0.6% (19/3,081) | 0.6% (19/3,118) | 0.99 |
| LVEF <40% | 8.03% (375/4,671) | 7.4% (348/4,675) | 0.32 |
| Clinical presentation |  |  | 0.99 |
| Stable CAD | 38.4% (2,029/5,290) | 37.8% (2,009/5,308) |  |
| Unstable CAD | 48.0% (2,540/5,290) | 48.1% (2,553/5,308) |
| NSTEMI | 8,0% (422/5,290) | 8.5% (453/5,308) |
| STEMI within 24 hrs | 4.4% (232/5,290) | 4.3% (228/5,308) |
| STEMI >24 hrs-7 d | 1.3% (67/5,290) | 1.2% (65/5,308) |  |
| Discharge medications |  |  |  |
| Aspirin | 99.8% (3,807/3,813) | 99.8% (3,833/3,844) | 0.25 |
| Clopidogrel | 99.6% (3,798/3,813) | 99.8% (3,836/3,845) | 0.20 |
| Beta-blockers | 69.2% (2,192/3,167) | 70.4% (2,224/3,159) | 0.30 |
| ACEI/ARB | 59.1% (1,872/3,167) | 57.9% (1,830/3,159) | 0.33 |
| Statins | 87.9% (2,785/3,167) | 86.7% (2,739/3,159) | 0.14 |
| Diseased vessels/patient | 1.5±0.8 | 1.5±0.8 | 0.98 |
| Number of stented vessels/patient | 1.2±0.5 | 1.2±0.5 | 0.97 |
| Number of stents/patient | 1.5±0.8 | 1.5±0.8 | 0.46 |
| Number of lesions stented/patient | 1.3±0.5 | 1.3±0.5 | 0.83 |
| Total stent length/patient (mm) | 35.1±24.0 | 35.6±23.9 | 0.41 |
| DES type |  |  | <0.01 |
| PES | 5.5% (235/4,299) | 5.6% (242/4,335) |  |
| SES | 3.6% (156/4,299) | 11.5% (498/4,335) |
| CoCr-EES | 20.0% (860/4,299) | 26.2% (1,134/4,335) |
| ZES (fast release) | 70.4% (3,028/4,299) | 56.2% (2,436/4,335) |
| Mixed | 0.5% (20/4,299) | 0.6% (25/4,335) |
| Stented coronary artery |  |  |  |
| Left main | 1.8% (70/3,911) | 1.8%(71/3,900) | 0.90 |
| LAD | 59.1% (2,311/3,911) | 58.4% (2,279/3,900) | 0.55 |
| Left circumflex | 27.3% (1,067/3,911) | 28.4% (1,109/3,900) | 0.25 |
| Right | 36.4% (1,262/3,464) | 31.5% (1,227/3,900) | 0.67 |
| Bifurcation | 15.1% (297/1,968) | 16.2% (1,959/3,900) | 0.25 |
| CTO | 2.8% (89/3,204) | 2.4% (77/3,197) | 0.35 |

Abbreviations as in Supplemental Table 4.

**Supplemental Table 9. Baseline clinical, angiographic and procedural characteristics of patients with acute coronary syndrome included in the landmark analysis and stratified according to dual antiplatelet therapy duration.**

|  | **Short DAPT**  **(≤6 months)** | **Long DAPT**  **(1 year)** | **P value** |
| --- | --- | --- | --- |
| Age | 63.1±11.1 | 63.0±11.1 | 0.83 |
| Male | 54.6% (1,237/2,265) | 52.6% (1,191/2,263) | 0.31 |
| Hypertension | 71.5% (1,620/2,265) | 72.6% (1,642/2,261) | 0.39 |
| Diabetes mellitus | 30.2% (679/2,249) | 28.4% (640/2,252) | 0.17 |
| Hypercholesterolemia | 61.0% (1,357/2,223) | 60.2% (1,340/2,227) | 0.50 |
| Smoking | 26.7% (558/2,091) | 26.5% (555/2,097) | 0.71 |
| Prior myocardial infarction | 19.9% (412/2,068) | 19.4% (404/2,079) | 0.59 |
| Prior PCI | 14.6% (303/2,073) | 12.5% (259/2,081) | 0.04 |
| Prior CABG | 5.5% (113/2,075) | 4.9% (102/2,080) | 0.47 |
| Prior stroke | 4.1% (56/1,354) | 3.9% (53/1,351) | 0.77 |
| CKD | 0.9% (15/1,636) | 1.0% (16/1,643) | 0.84 |
| LVEF <40% | 8.7% (173/1,979) | 7.9% (154/1,959) | 0.35 |
| Clinical presentation |  |  | 0.70 |
| Unstable CAD | 68.2% (1,544/2,265) | 67.0% (1,517/2,263) |  |
| NSTEMI | 18.6% (422/2,265) | 20.0% (453/2,263) |
| STEMI< 24 hrs | 10.2% (232/2,265) | 10.1% (228/2,263) |
| STEMI 24 hs-7 d | 3.0% (67/2,265) | 2.9% (65/2,263) |  |
| Discharge medications |  |  |  |
| Aspirin | 99.8% (1,442/1,445) | 99.7% (1,457/1,461) | 0.75 |
| Clopidogrel | 99.7% (1,441/1,445) | 99.6% (1,456/1,462) | 0.58 |
| Beta blockers | 71.3% (887/1,244) | 69.5% (866/1,247) | 0.30 |
| ACEI/ARB | 66.2% (823/1,244) | 62.2% (776/1,247) | 0.04 |
| Statins | 85.4% (1,062/1,244) | 86.2% (1,075/1,247) | 0.54 |
| Diseased vessels/patient | 1.6±0.9 | 1.6±0.8 | 0.22 |
| Number of stented vessels/patient | 1.2±0.5 | 1.3±0.5 | 0.32 |
| Number of stents/patient | 1.5±0.8 | 1.6±0.9 | 0.40 |
| Number of lesions stented/patient | 1.3±0.5 | 1.3±0.6 | 0.56 |
| Total stent length/patient (mm) | 34.5±22.9 | 36.1±24.5 | 0.08 |
| DES type |  |  | <0.01 |
| PES | 8.8% (166/1,894) | 8.8% (168/1,917) |  |
| SES | 4.3% (81/1,894) | 9.8% (188/1,917) |
| CoCr-EES | 23.9% (453/1,894) | 31.4% (601/1,917) |
| ZES (fast release) | 62.6% (1,185/1,894) | 49.2% (944/1,917) |
| Mixed | 0.5% (9/1,894) | 0.8% (16/1,917) |
| Stented coronary artery |  |  |  |
| Left main | 2.1% (38/1,776) | 2.6% (47/1,777) | 0.32 |
| LAD | 58.5% (1,038/1,776) | 59.6% (1,059/1,777) | 0.49 |
| Left circumflex | 27.2% (483/1,776) | 28.9% (514/1,777) | 0.25 |
| Right | 33.1% (589/1,776) | 31.8% (566/1,777) | 0.41 |
| Bifurcation | 13.2% (127/965) | 14.2% (137/966) | 0.77 |
| CTO | 2.4% (30/1,259) | 2.1% (27/1,264) | 0.59 |

Abbreviations as in Supplemental Table 4.

**Supplemental Table 10. Baseline clinical, angiographic and procedural characteristics of patients with stable coronary artery disease included in the landmark analysis and stratified according to dual antiplatelet therapy duration.**

|  | **Short DAPT**  **(≤6 months)** | **Long DAPT**  **(1 year)** | **P value** |
| --- | --- | --- | --- |
| Age | 62.9±10.1 | 63.1±10.5 | 0.39 |
| Male | 37.0% (1,197/3,235) | 36.8% (1,192/3,242) | 0.93 |
| Hypertension | 82.5% (2,663/3,227) | 82.9% (2,680/3,233) | 0.57 |
| Diabetes mellitus | 31.9% (1,024/3,209) | 33.5% (1,078/3,212) | 0.13 |
| Hypercholesterolemia | 66.0% (2,099/3,181) | 67.7% (2,151/3,177) | 0.13 |
| Smoking | 19.3% (515/2,666) | 18.1% (480/2,645) | 0.32 |
| Prior myocardial infarction | 22.8% (654/2,874) | 22.8% (651/2,853) | 0.77 |
| Prior PCI | 21.1% (609/2,889) | 19.8% (569/2,866) | 0.43 |
| Prior CABG | 6.2% (178/2,888) | 7.0% (199/2,862) | 0.16 |
| Prior stroke | 3.8% (86/2,251) | 3.5% (77/2,203) | 0.64 |
| CKD | 0.3% (4/1,445) | 0.2% (3/1,474) | 0.69 |
| LVEF <40% | 7.5% (202/2,692) | 7.1% (194/2,716) | 0.63 |
| Discharge medications |  |  |  |
| Aspirin | 99.9% (2,365/2,368) | 99.7% (2,376/2,383) | 0.22 |
| Clopidogrel | 99.5% (2,357/2,368) | 99.9% (2,380/2,383) | 0.40 |
| Beta blockers | 67.9% (1,305/1,923) | 71.0% (1,358/1,912) | 0.03 |
| ACEI/ARB | 54.6% (1,049/1,923) | 55.1% (1,054/1,912) | 0.71 |
| Statins | 89.6% (1,723/1,923) | 87.0% (1,664/1,912) | 0.12 |
| Diseased vessels/patient, n | 1.4±0.8 | 1.4±0.8 | 0.32 |
| Stented vessels/patient, n | 1.2±0.4 | 1.2±0.4 | 0.36 |
| Stents/patient, n | 1.5±0.8 | 1.5±0.8 | 0.85 |
| Lesions stented/patient, n | 1.3±0.5 | 1.3±0.5 | 0.81 |
| Total stent length/patient (mm) | 35.9±25.6 | 35.0±23.0 | 0.45 |
| DES type |  |  | <0.01 |
| PES | 2.9% (69/2,405) | 3.1% (74/2,417) |  |
| SES | 3.1% (75/2,405) | 12.8% (310/2,417) |
| CoCr-EES | 16.9% (407/2,405) | 22.0%( 532/2,417) |
| ZES (fast release) | 76.6% (1,843/2,405) | 61.7% (1,492/2,417) |
| Mixed | 0.5% (11/2,405) | 0.4% (9/2,417) |
| Stented coronary artery |  |  |  |
| Left main | 1.1% (24/2,122) | 1.5% (32/2,135) | 0.30 |
| LAD | 59.6% (1,273/2,135) | 57.5% (1,220/2,122) | 0.14 |
| Left circumflex | 27.4% (584/2,135) | 28.0% (594/2,122) | 0.63 |
| Right | 30.9% (659/2,135) | 31.2% (661/2,122) | 0.84 |
| Bifurcation | 17.0% (170/1,003) | 18.1% (180/993) | 0.21 |
| CTO | 3.0% (59/1,945) | 2.6% (50/1,933) | 0.45 |

Abbreviations as in Supplemental Table 4.

**Supplemental Table 11. Clinical outcomes of short-term (≤6-month) versus long-term (1-year) dual antiplatelet therapy in the landmark period between dual antiplatelet therapy discontinuation and 1 year.**

|  | Estimates of risk for  short versus long DAPT* | Hazard ratio  (95% CI) | Interaction p |
| --- | --- | --- | --- |
| **MI or definite/probable ST** |  |  | 0.07 |
| All patients | 0.84% vs. 0.83% | 1.02 (0.67-1.56) |  |
| Stable patients | 0.45% vs. 0.73% | 0.63 (0.32-1.24) |  |
| ACS patients | 1.40% vs. 0.97% | 1.44 (0.81-2.55) |  |
| **Cardiac death** |  |  | 0.83 |
| All patients | 0.75% vs. 0.77% | 0.99 (0.64-1.55) |  |
| Stable patients | 0.75% vs. 0.72% | 1.03 (0.58-1.86) |  |
| ACS patients | 0.76% vs. 0.84% | 0.94 (0.47-1.85) |  |
| **Non-cardiac death** |  |  | 0.08 |
| All patients | 0.51% vs. 0.83% | 0.62 (0.38-1.01) |  |
| Stable patients | 0.46% vs. 0.45% | 1.05 (0.49-2.24) |  |
| ACS patients | 0.57% vs. 1.38% | 0.42 (0.21-0.83) |  |
| **All-cause death** |  |  | 0.22 |
| All patients | 1.28% vs. 1.67% | 0.78 (0.57-1.08) |  |
| Stable patients | 1.22% vs. 1.28% | 0.96 (0.61-1.51) |  |
| ACS patients | 1.38% vs. 2.22% | 0.64 (0.40-1.01) |  |
| **MI** |  |  | 0.047 |
| All patients | 0.80% vs. 0.81% | 0.99 (0.64-1.53) |  |
| Stable patients | 0.42% vs. 0.72% | 0.59 (0.30-1.16) |  |
| ACS patients | 1.35% vs. 0.92% | 1.46 (0.82-2.62) |  |
| **Stroke** |  |  | 0.27 |
| All patients | 0.39% vs. 0.44% | 0.89 (0.49-1.64) |  |
| Stable patients | 0.50% vs. 0.44% | 1.14 (0.54-2.40) |  |
| ACS patients | 0.24% vs. 0.45% | 0.54 (0.18-1.63) |  |
| **Definite/probable ST** |  |  | 0.94 |
| All patients | 0.28% vs. 0.16% | 1.73 (0.73-4.13) |  |
| Stable patients | 0.09% vs. 0.07% | 1.49 (0.25-8.92) |  |
| ACS patients | 0.54% vs. 0.29% | 1.82 (0.67-4.93) |  |
| **Any bleeding** |  |  | 0.95 |
| All patients | 0.47% vs. 0.96% | 0.48 (0.30-0.79) |  |
| Stable patients | 0.45% vs. 0.97% | 0.48 (0.25-0.90) |  |
| ACS patients | 0.50% vs. 0.95% | 0.49 (0.23-1.05) |  |
| **Major bleeding** |  |  | 0.57 |
| All patients | 0.15% vs 0.48% | 0.32 (0.14-0.70) |  |
| Stable patients | 0.19% vs 0.53% | 0.37 (0.15-0.95) |  |
| ACS patients | 0.10% vs 0.42% | 0.37 (0.05-1.01) |  |
| **Target vessel revascularization** |  |  | 0.02 |
| All patients | 3.17% vs 2.66% | 1.20 (0.96-1.51) |  |
| Stable patients | 2.69% vs 2.90% | 0.94 (0.70-1.27) |  |
| ACS patients | 3.86% vs 2.32% | 1.68 (1.18-2.39) |  |
| **Cardiac death, MI, or definite/probable ST** |  |  | 0.31 |
| All patients | 1.47% vs. 1.42% | 1.05 (0.76-1.45) |  |
| Stable patients | 1.14% vs. 1.28% | 0.89 (0.56-1.40) |  |
| ACS patients | 1.96% vs. 1.62% | 1.24 (0.78-1.96) |  |
| **Cardiac death or MI** |  |  | 0.35 |
| All patients | 1.44% vs. 1.40% | 1.04 (0.75-1.43) |  |
| Stable patients | 1.11% vs. 1.24% | 0.89 (0.56-1.41) |  |
| ACS patients | 1.91% vs. 1.62% | 1.21 (0.76-1.91) |  |
| **Cardiac death, MI, or stroke** |  |  | 0.75 |
| All patients | 1.84% vs. 1.78% | 1.04 (0.78-1.38) |  |
| Stable patients | 1.61% vs. 1.62% | 0.99 (0.67-1.47) |  |
| ACS patients | 2.16% vs. 2.02% | 1.09 (0.72-1.67) |  |
| **Cardiac death, MI, stroke, or major bleeding** |  |  | 0.92 |
| All patients | 1.94% vs. 2.12% | 0.92 (0.70-1.21) |  |
| Stable patients | 1.76% vs. 1.94% | 0.91 (0.63-1.31) |  |
| ACS patients | 2.20% vs. 2.39% | 0.93 (0.62-1.39) |  |
| **All-cause death or MI** |  |  | 0.94 |
| All patients | 1.93% vs. 2.24% | 0.87 (0.66-1.14) |  |
| Stable patients | 1.55% vs. 1.78% | 0.88 (0.59-1.30) |  |
| ACS patients | 2.47% vs. 2.90% | 0.86 (0.59-1.24) |  |
| **All-cause death, MI, or stroke** |  |  | 0.41 |
| All patients | 2.33% vs. 2.55% | 0.92 (0.72-1.18) |  |
| Stable patients | 2.06% vs. 2.03% | 1.02 (0.72-1.46) |  |
| ACS patients | 2.71% vs. 3.30% | 0.83 (0.58-1.18) |  |
| **All-cause death, MI, stroke, or major bleeding** |  |  | 0.34 |
| All patients | 2.41% vs. 2.91% | 0.83 (0.65-1.06) |  |
| Stable patients | 2.19% vs. 2.37% | 0.93 (0.67-1.31) |  |
| ACS patients | 2.71% vs. 3.68% | 0.74 (0.52-1.04) |  |

DAPT denotes dual antiplatelet therapy; ACS denotes acute coronary syndrome; MI denotes myocardial infarction; ST denotes stent thrombosis; HR denotes, hazard ratio; CI denotes confidence interval. *Determined by Kaplan Meyer analysis

**Supplemental Table 12. Clinical outcomes and interaction analysis of short-term (≤6-month) versus long-term (1-year) dual antiplatelet therapy in patients stratified by clinical presentation and a prior history of myocardial infarcion.**

|  | Estimates of risk of short versus long DAPT* | Hazard ratio  (95% CI) | Interaction p |
| --- | --- | --- | --- |
| **MI or definite/probable ST** |  |  | 0.033 |
| No ACS, no prior MI | 1.76 vs 1.55 | 1.14 (0.72-1.79) |  |
| No ACS, prior MI | 1.80 vs 2.98 | 0.59 (0.28-1.21) |  |
| ACS, no prior MI | 1.52 vs 1.51 | 1.02 (0.59-1.76) |  |
| ACS, prior MI | 6.99 vs 2.59 | **2.78 (1.39-5.52)** |  |
| **Cardiac death** |  |  | 0.92 |
| No ACS, no prior MI | 1.02 vs 0.93 | 1.08 (0.60-1.95) |  |
| No ACS, prior MI | 1.51 vs 1.66 | 0.90 (0.38-2.12) |  |
| ACS, no prior MI | 0.71 vs 1.28 | 0.55 (0.27-1.12) |  |
| ACS, prior MI | 2.95 vs 2.55 | 1.13 (0.51-2.54) |  |
| **Non-cardiac death** |  |  | 0.14 |
| No ACS, no prior MI | 0.49 vs 0.53 | 0.89 (0.39-2.02) |  |
| No ACS, prior MI | 0.91 vs 0.75 | 1.21 (0.37-3.96) |  |
| ACS, no prior MI | 0.77 vs 1.07 | 0.73 (0.36-1.48) |  |
| ACS, prior MI | 2.07 vs 0.72 | 2.84 (0.77-10.50) |  |
| **All-cause death** |  |  | 0.34 |
| No ACS, no prior MI | 1.50 vs 1.46 | 1.01 (0.63-1.63) |  |
| No ACS, prior MI | 2.26 vs 2.40 | 0.94 (0.47-1.91) |  |
| ACS, no prior MI | 1.47 vs 2.33 | 0.63 (0.38-1.04) |  |
| ACS, prior MI | 4.96 vs 3.26 | 1.49 (0.76-2.91) |  |
| **MI** |  |  | 0.033 |
| No ACS, no prior MI | 1.58 vs 1.42 | 1.12 (0.70-1.81) |  |
| No ACS, prior MI | 1.65 vs 2.82 | 0.57 (0.27-1.20) |  |
| ACS, no prior MI | 1.28 vs 1.45 | 0.90 (0.51-1.59) |  |
| ACS, prior MI | 6.56 vs 2.34 | **2.85 (1.39-5.85)** |  |
| **Stroke** |  |  | 0.47 |
| No ACS, no prior MI | 0.45 vs 0.62 | 0.71 (0.32-1.60) |  |
| No ACS, prior MI | 0.16 vs 0.31 | 0.50 (0.05-5.54) |  |
| ACS, no prior MI | 0.70 vs 0.47 | 1.51 (0.62-3.71) |  |
| ACS, prior MI | 0.68 vs 0.47 | 1.45 (0.24-8.68) |  |
| **Definite/probable ST** |  |  | 0.18 |
| No ACS, no prior MI | 0.44 vs 0.45 | 0.99 (0.41-2.39) |  |
| No ACS, prior MI | 0.30 vs 0.59 | 0.51 (0.09-2.75) |  |
| ACS, no prior MI | 0.52 vs 0.47 | 1.13 (0.44-2.94) |  |
| ACS, prior MI | 1.59 vs 0.48 | 3.40 (0.71-16.38) |  |
| **Any bleeding** |  |  | 0.80 |
| No ACS, no prior MI | 1.32 vs 1.87 | 0.71 (0.44-1.13) |  |
| No ACS, prior MI | 2.24 vs 2.37 | 0.94 (0.47-1.90) |  |
| ACS, no prior MI | 0.71 vs 1.63 | 0.43 (0.22-0.85) |  |
| ACS, prior MI | 1.15 vs 1.91 | 0.60 (0.20-1.84) |  |
| **Major bleeding** |  |  | 0.95 |
| No ACS, no prior MI | 0.40 vs 0.76 | 0.53 (0.23-1.18) |  |
| No ACS, prior MI | 0.75 vs 1.05 | 0.73 (0.23-2.30) |  |
| ACS, no prior MI | 0.41 vs 0.81 | 0.50 (0.20-1.25) |  |
| ACS, prior MI | 0.23 vs 0.48 | 0.48 (0.04-5.32) |  |
| **Target vessel revascularization** |  |  | 0.42 |
| No ACS, no prior MI | 3.14 vs 3.09 | 1.03 (0.74-1.44) |  |
| No ACS, prior MI | 3.52 vs 4.40 | 0.79 (0.46-1.37) |  |
| ACS, no prior MI | 3.80 vs 2.59 | 1.48 (1.00-2.17) |  |
| ACS, prior MI | 6.37 vs 4.72 | 1.35 (0.76-2.40) |  |
| **Cardiac death, MI, or definite/probable ST** |  |  | 0.23 |
| No ACS, no prior MI | 2.59 vs 2.17 | 1.20 (0.82-1.75) |  |
| No ACS, prior MI | 2.70 vs 4.02 | 0.66 (0.36-1.19) |  |
| ACS, no prior MI | 2.16 vs 2.26 | 0.97 (0.62-1.52) |  |
| ACS, prior MI | 8.57 vs 4.88 | **1.77 (1.04-3.01)** |  |
| **Cardiac death or MI** |  |  | 0.31 |
| No ACS, no prior MI | 2.50 vs 2.04 | 1.23 (0.84-1.82) |  |
| No ACS, prior MI | 2.70 vs 3.88 | 0.68 (0.37-1.24) |  |
| ACS, no prior MI | 1.99 vs 2.26 | 0.89 (0.56-1.41) |  |
| ACS, prior MI | 8.35 vs 4.88 | **1.72 (1.01-2.93)** |  |
| **Cardiac death, MI, or stroke** |  |  | 0.16 |
| No ACS, no prior MI | 2.82 vs 2.49 | 1.14 (0.79-1.63) |  |
| No ACS, prior MI | 2.85 vs 4.18 | 0.68 (0.38-1.21) |  |
| ACS, no prior MI | 2.28 vs 2.55 | 0.90 (0.59-1.39) |  |
| ACS, prior MI | 9.01 vs 5.10 | **1.78 (1.06-3.00)** |  |
| **Cardiac death, MI, stroke, or major bleeding** |  |  | 0.08 |
| No ACS, no prior MI | 3.25 vs 3.19 | 1.02 (0.74-1.42) |  |
| No ACS, prior MI | 3.60 vs 4.78 | 0.75 (0.44-1.28) |  |
| ACS, no prior MI | 2.86 vs 3.36 | 0.86 (0.59-1.26) |  |
| ACS, prior MI | 9.23 vs 5.84 | **1.75 (1.05-2.92)** |  |
| **All-cause death or MI** |  |  | 0.44 |
| No ACS, no prior MI | 2.38 vs 2.04 | 1.16 (0.78-1.72) |  |
| No ACS, prior MI | 2.86 vs 3.00 | 0.96 (0.51-1.79) |  |
| ACS, no prior MI | 2.52 vs 3.21 | 0.80 (0.53-1.19) |  |
| ACS, prior MI | 6.76 vs 4.44 | 1.50 (0.84-2.66) |  |
| **All-cause death, MI, or stroke** |  |  | 0.40 |
| No ACS, no prior MI | 2.65 vs 2.35 | 1.12 (0.78-1.63) |  |
| No ACS, prior MI | 3.01 vs 3.00 | 1.01 (0.54-1.87) |  |
| ACS, no prior MI | 2.99 vs 3.67 | 0.82 (0.57-1.19) |  |
| ACS, prior MI | 6.99 vs 4.67 | 1.48 (0.84-2.60) |  |
| **All-cause death, MI, stroke, or major bleeding** |  |  | 0.30 |
| No ACS, no prior MI | 2.87 vs 2.71 | 1.06 (0.75-1.50) |  |
| No ACS, prior MI | 3.32 vs 3.30 | 1.01 (0.56-1.82) |  |
| ACS, no prior MI | 3.23 vs 4.21 | 0.77 (0.55-1.10) |  |
| ACS, prior MI | 6.99 vs 4.67 | 1.48 (0.84-2.60) |  |

ACS denotes acute coronary MI denotes myocardial infarction; ST denotes stent thrombosis, CI denotes confidence interval. *Determined by Kaplan Meier analysis.

**Supplemental Figure Legend**

**Supplemental Figure 1.** Flow chart of the study.

**Supplemental Figure 2.** Evidence network of the randomized trials included in the network meta-analysis.

**Supplemental Figure 3.** Funnel plot of randomized controlled trials included in the meta-analysis for the risk of 1-year myocardial infarction or definite/probable stent thrombosis.

**Supplemental Figure 1**


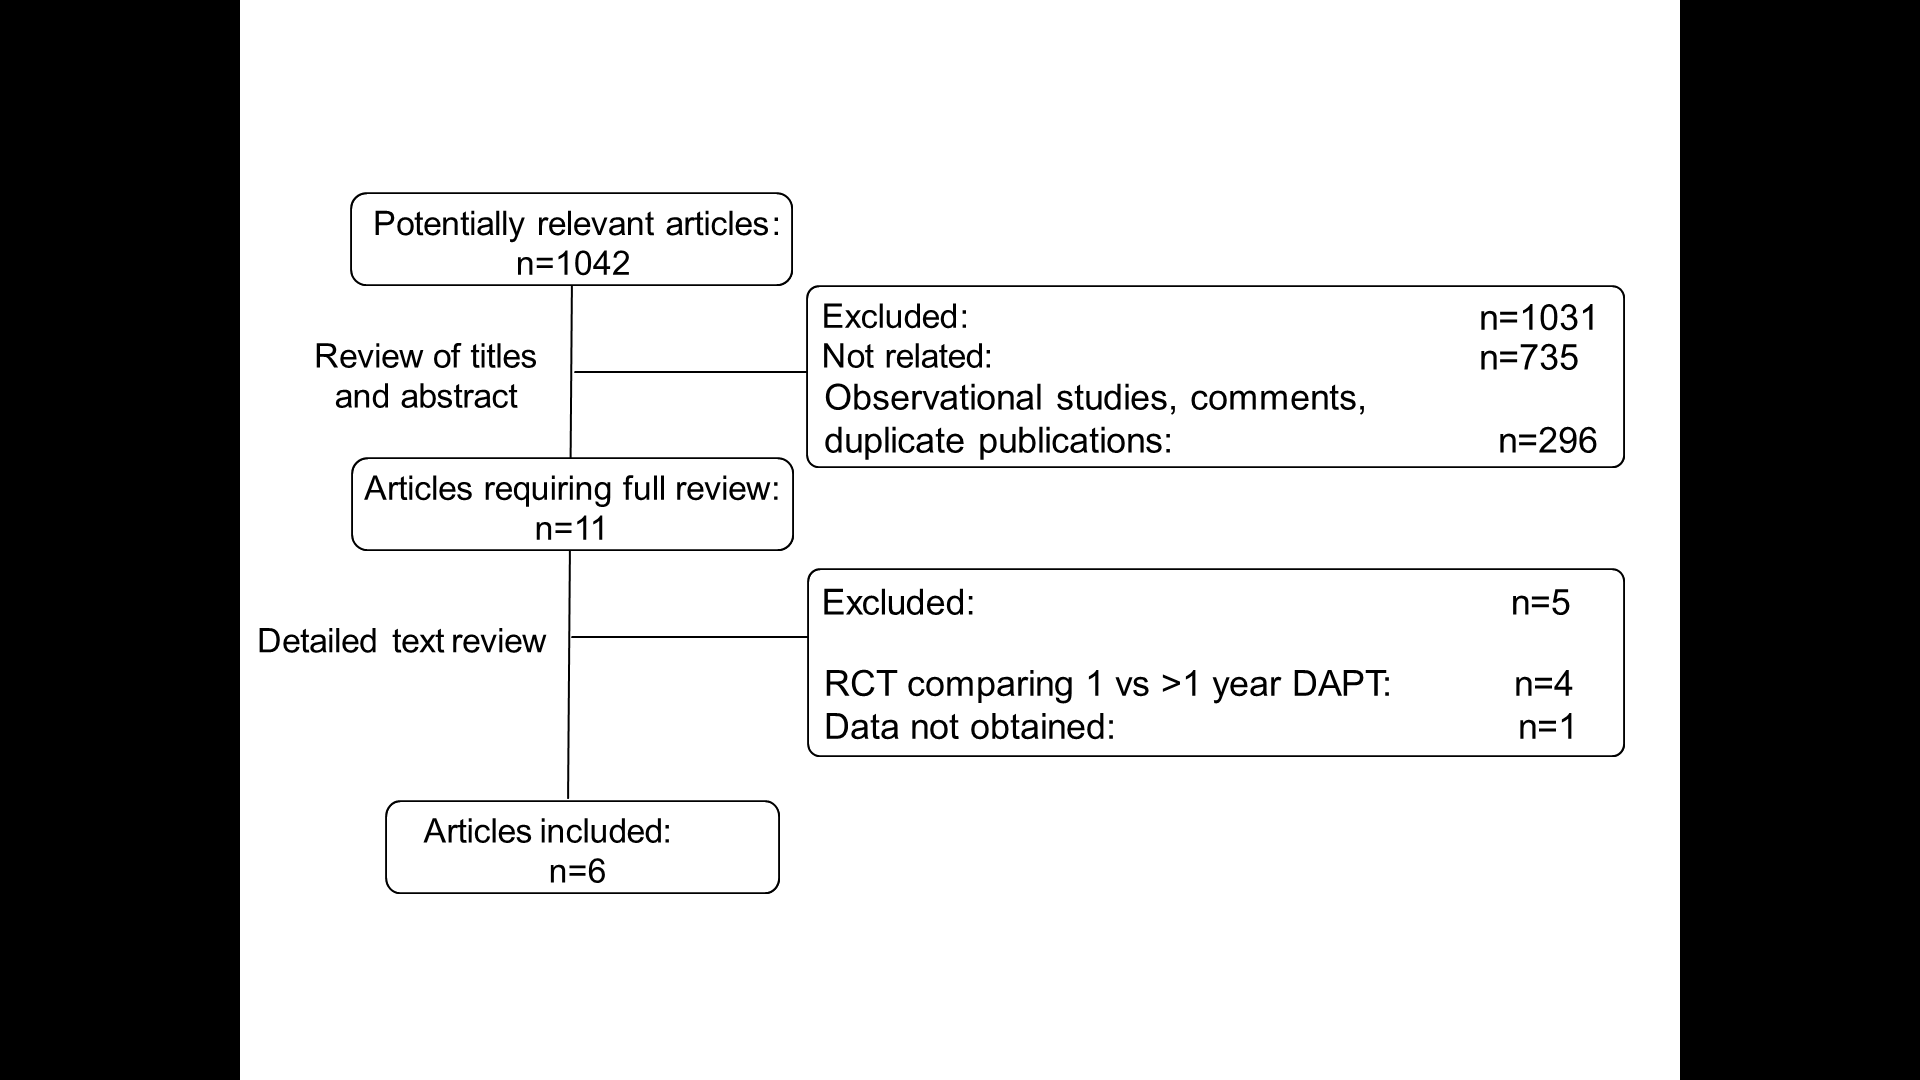


**Supplemental Figure 2**


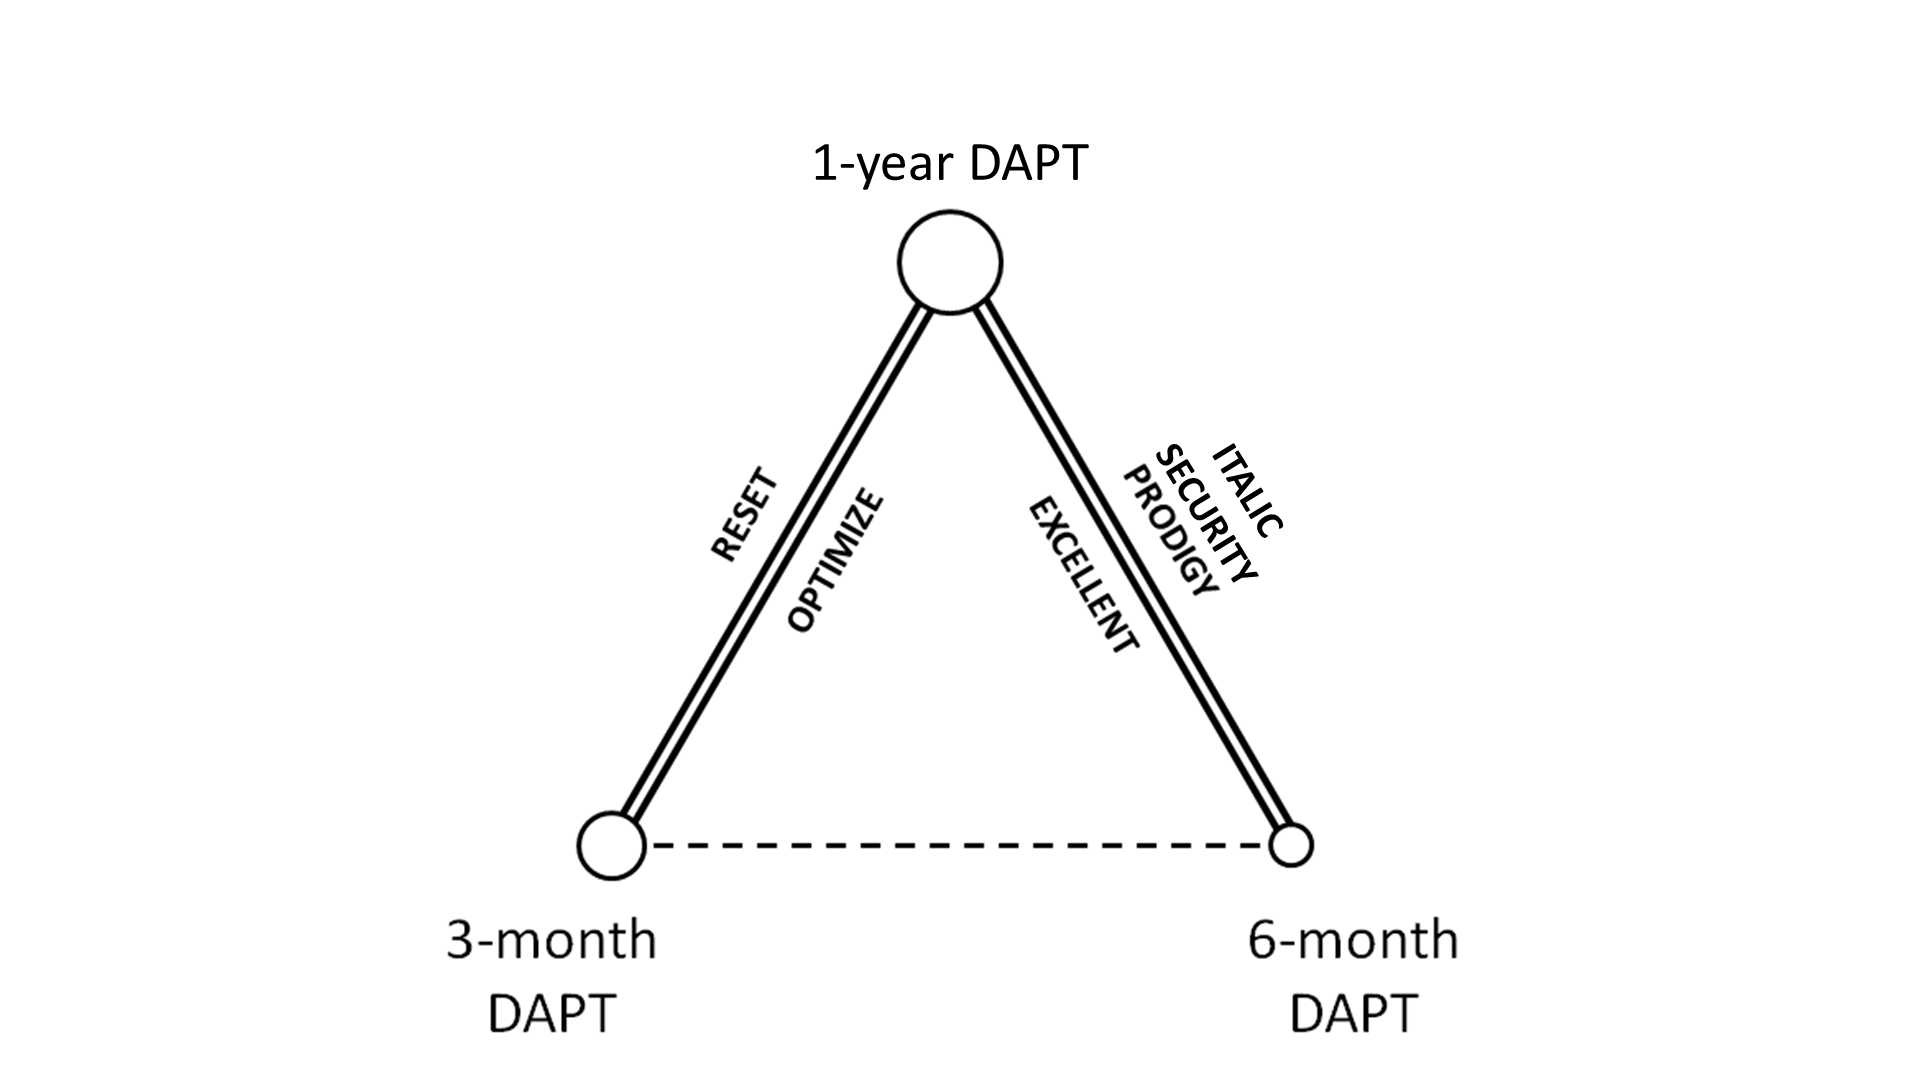


**Supplemental Figure 3**

**
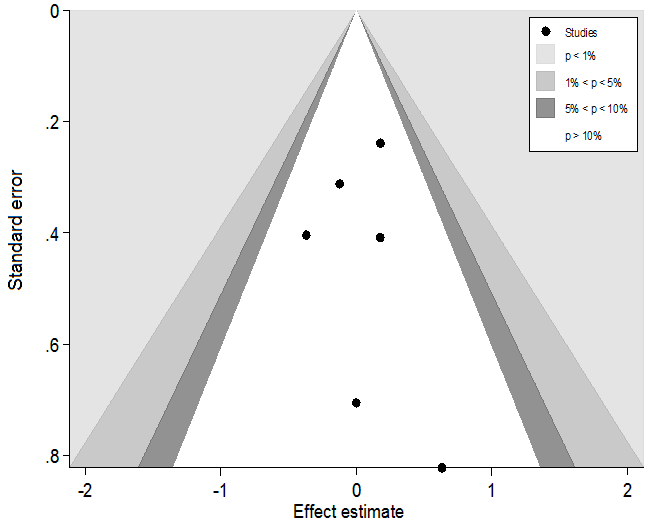
**
